# Supplementary material
Source: publisher figshare collection journal article supplement (https://gsapubs.figshare.com/articles/dataset/_/12670904)
Supplement: Supplementary file 1 [file 1]

Ronemus, C.B., Orme, D.A., Campbell, S., Black, S.R., and Cook, J., 2020, Mesoproterozoic–Early Cretaceous provenance and paleogeographic evolution of the Northern Rocky Mountains: Insights from the detrital zircon record of the Bridger Range, Montana, USA: GSA Bulletin, <https://doi.org/10.1130/B35628.1>.

## Supplemental Material

**Supplemental item 1: Table S1.** Original sample information and U-Pb geochronologic analyses.

**Supplemental item 2: Figure S2.** Comparison of age-probability visualization methods for detrital zircon data from Bridger Range, Montana

**Supplemental item 3: Table S2.** Compiled sample U-Pb geochronologic analyses.

**Supplemental item 4: Table S3.** NMF sources, source weights, and goodness of fit metrics.

Figure S2: Comparison of age-probability visualization methods for detrital zircon data from Bridger Range, Montana

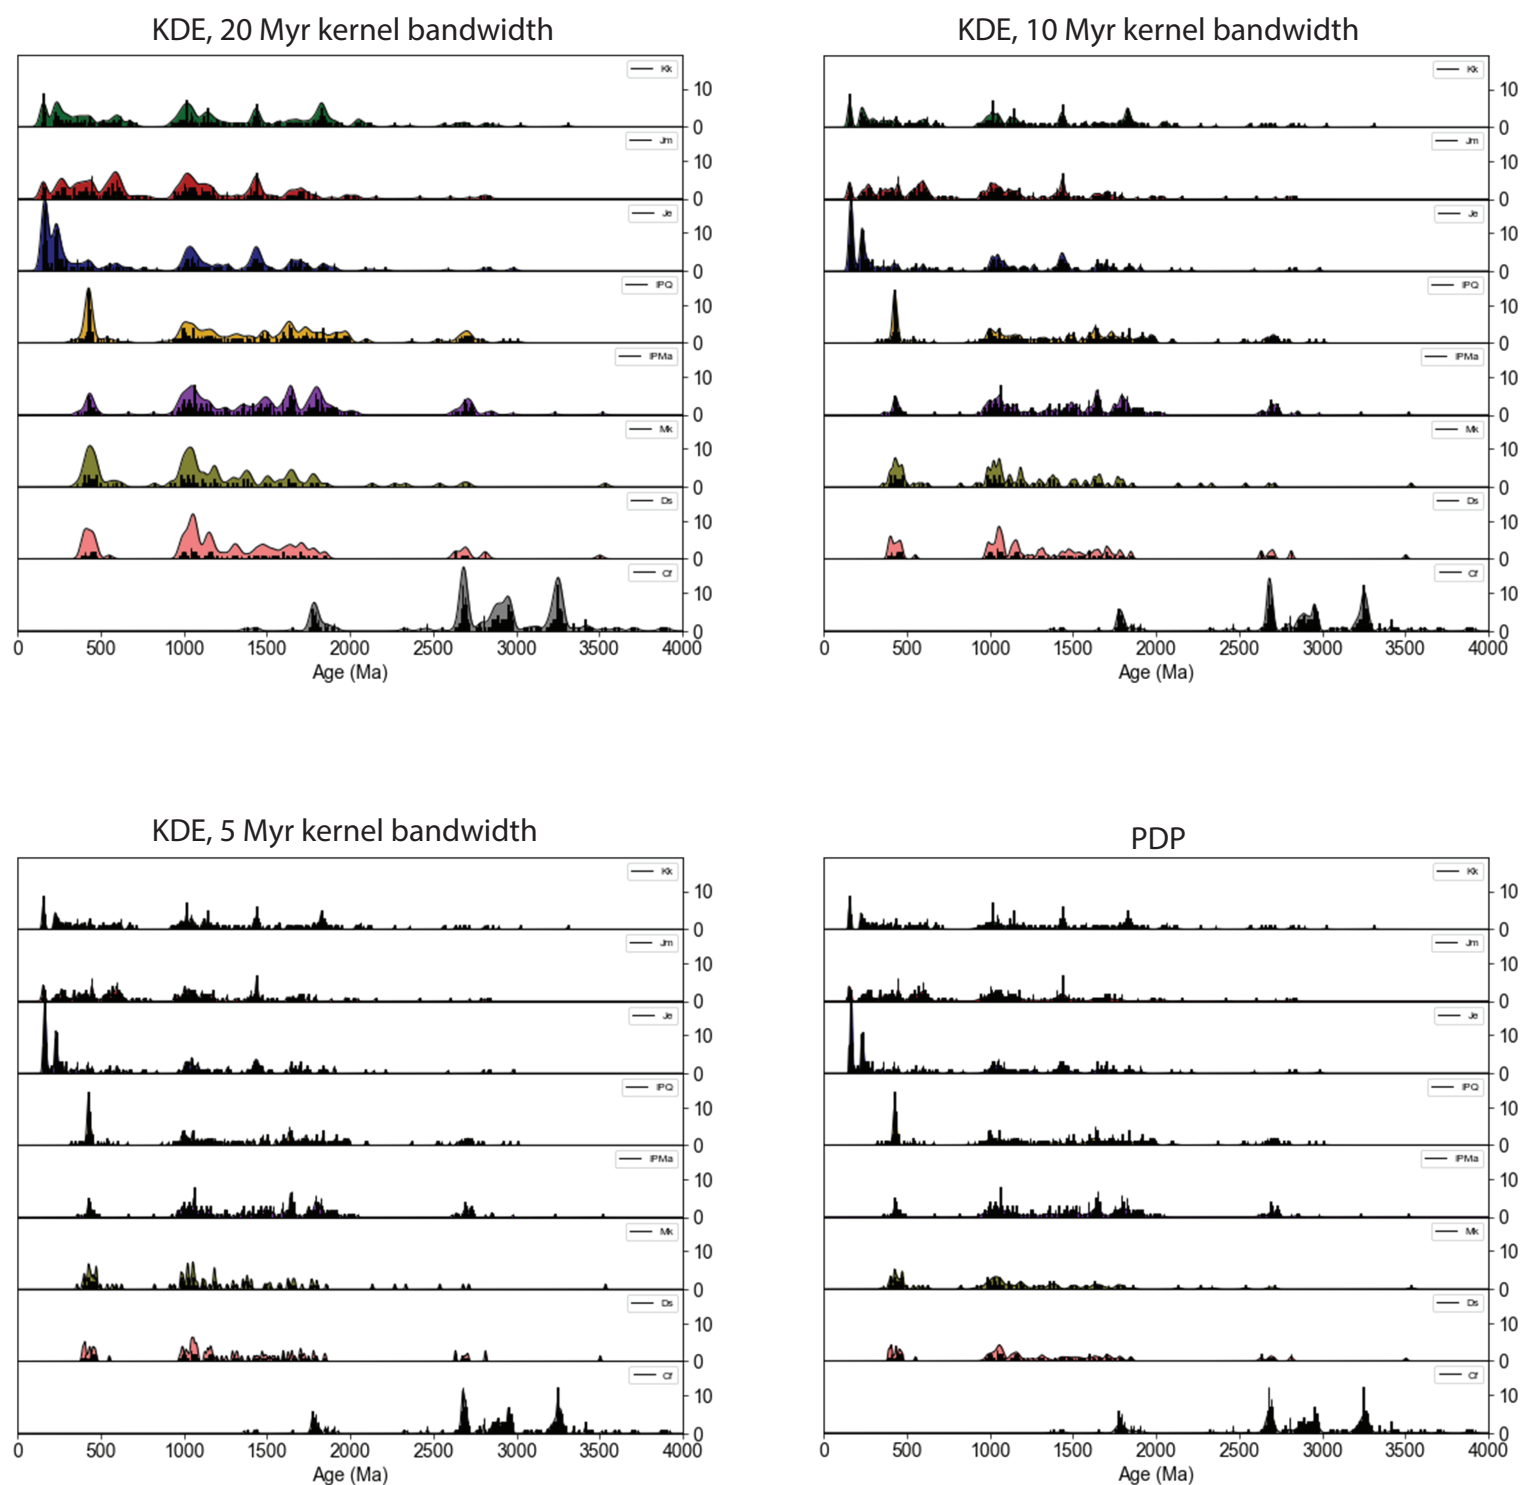

Comparison of PDPs and KDEs with a kernel bandwidth of 5, 10, and 20 Myr for detrital zircon data from the Bridger Range, Montana. Included histogram has a bin width of 5 Myr. Y-axis corresponds to number of analyses per histogram bin. Figure 3 includes KDEs with a kernel bandwidth of 10 Myr to avoid under- and oversmoothing and best represent samples with variable analysis precision and number of analyses. Curves were generated using detritalPy python script (Sharman et al., 2018).
